# Supplementary material for: Realizing a colorful polymer solar cell with high color purityviaa metal alloy-dielectric–metal alloy electrode
Source: Royal Society of Chemistry journal article supplement (doi:10.1039/d1tc02716f), 2021-01-01
Supplement: d1tc02716f1.pdf [file d1tc02716f1.pdf]

## Supporting Information

### **Realizing a colorful polymer solar cell with high color purity via a metal alloy- dielectric-metal alloy electrode**

Sajar Biring<sup>a,b</sup>, Abdul Khalik Akbar<sup>a,b</sup>, Dian Luo<sup>c</sup>, Yi-Nan Lin<sup>a</sup>, Goutam Kumar Dalapati<sup>a,d</sup>, and Shun-Wei Liu<sup>a,b\*</sup>

<sup>a</sup>Organic Electronics Research Center and Department of Electronic Engineering, Ming Chi University of Technology, New Taipei City 24301, Taiwan.

<sup>b</sup>Department of Electronic Engineering, Ming Chi University of Technology, New Taipei City 24301, Taiwan.

<sup>c</sup>Institute of Lighting and Energy Photonics, National Chiao Tung University, Tainan 71150, Taiwan.

<sup>d</sup>Department of Physics, SRM University-AP, Amaravati 522502, India.

\*Corresponding authors:

E-mail:

[swliu@mail.mcut.edu.tw](mailto:swliu@mail.mcut.edu.tw) (S.-W. Liu)

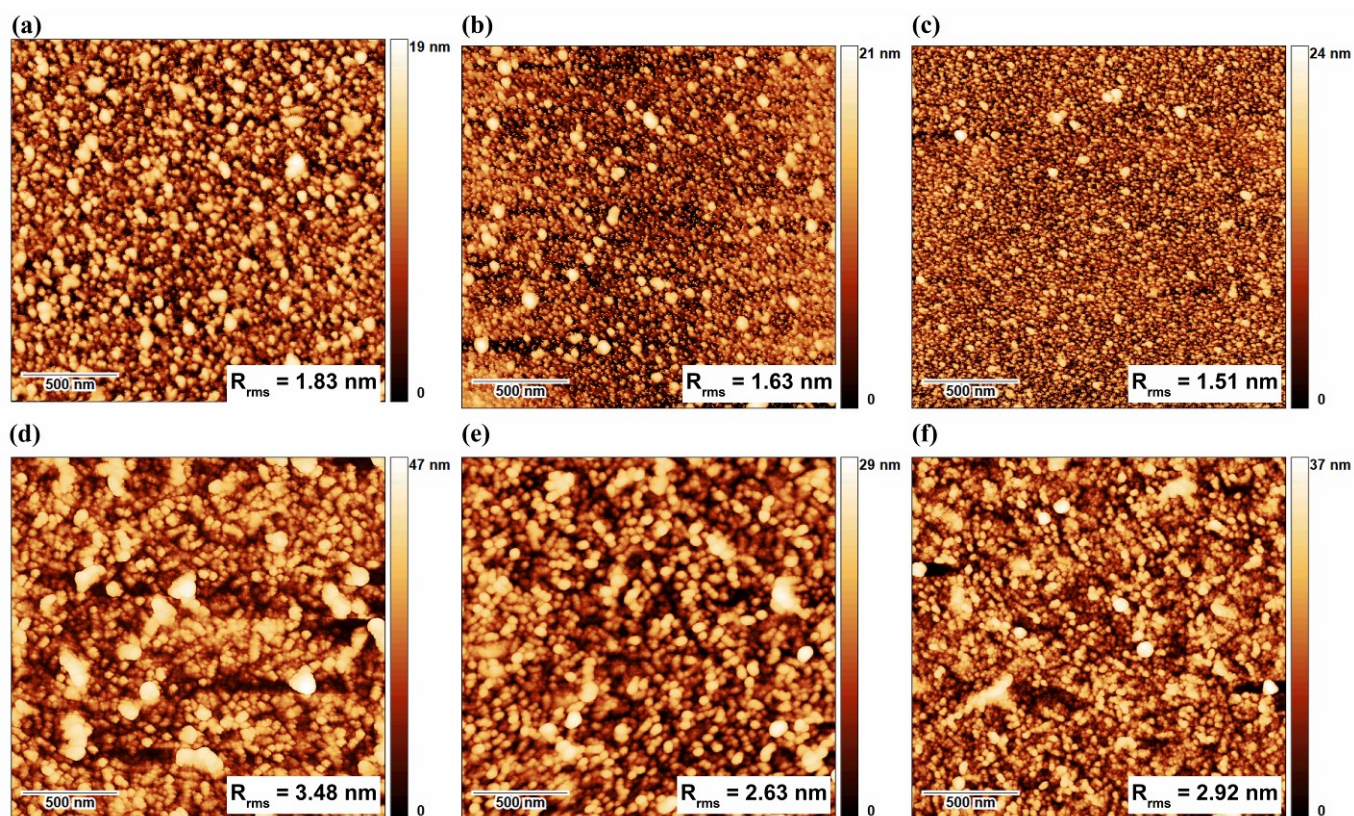

**Fig. S1** The film morphology of 30 nm metal film (a) Ag, (b) Cu:Ag, (c) Al:Ag deposited on 7 nm MoO<sub>3</sub> and (d) Ag, (e) Cu:Ag, (f) Al:Ag deposited on 75 nm HAT-CN.

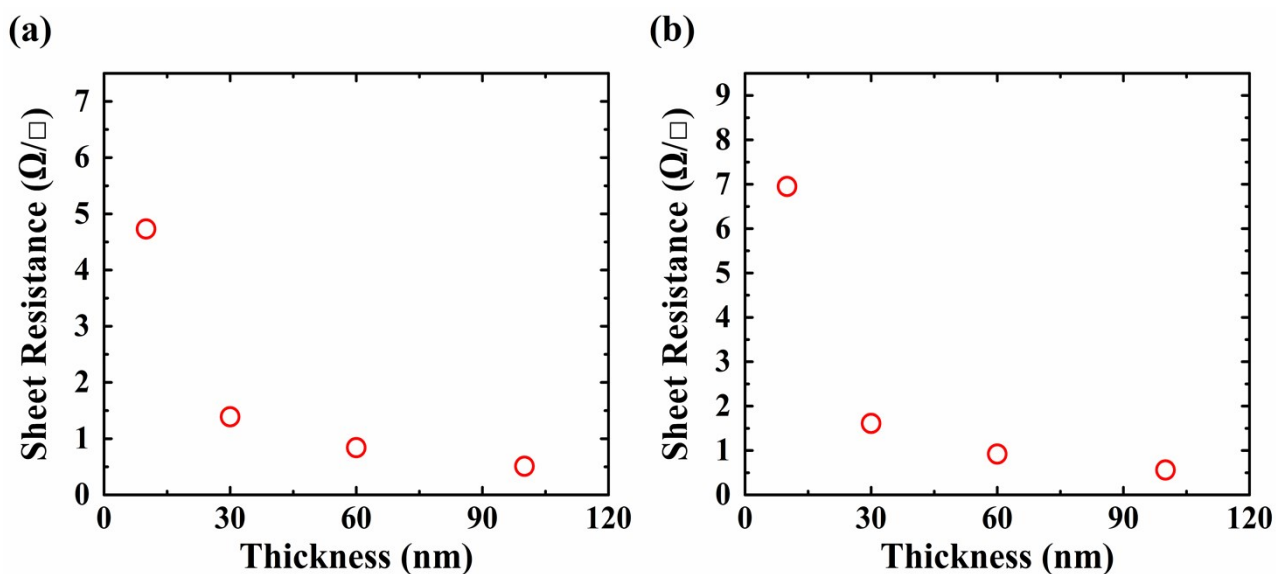

**Fig. S2** The sheet resistance vs thickness of Al:Ag was deposited on (a) MoO<sub>3</sub> and (b) HAT-CN.

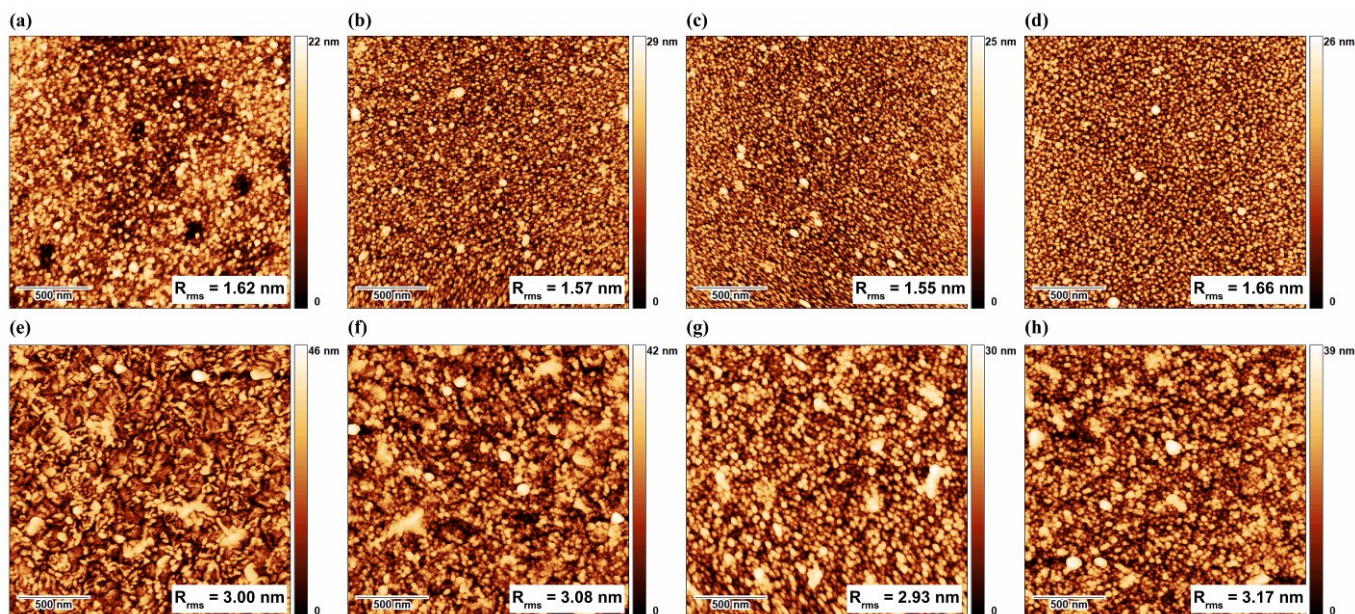

**Fig. S3** The different thickness of Al:Ag for (a) 10 nm, (b) 30 nm, (c) 60 nm, (d) 100 nm deposited on 7 nm MoO<sub>3</sub> and (e) 10 nm, (f) 30 nm, (g) 60 nm and (h) 100 nm deposited on 75 nm HAT-CN.

**Table S1** Summary on transmissive colorful solar cells with various FP structures

| Structure                                                                             | Electrode                                                           | Highest PCE (%) | Ref       |
|---------------------------------------------------------------------------------------|---------------------------------------------------------------------|-----------------|-----------|
| ITO/PEDOT:PSS/MoO <sub>3</sub> /DTDCPB/DTDCPB:C <sub>70</sub> /C <sub>70</sub> /Bphen | Ag/NPB/Ag                                                           | 5.15%           | 42        |
| ITO/PEDOT:PSS/PTB7-Th:PC <sub>71</sub> BM/ZnO/Sb <sub>2</sub> O <sub>3</sub>          | Ag/Sb <sub>2</sub> O <sub>3</sub> /Ag                               | 7.03%           | 43        |
| ITO/PEDOT:PSS/PTB7-Th:IEICO-4F/ZnO/Ag                                                 | Sb <sub>2</sub> O <sub>3</sub> /Ag/Sb <sub>2</sub> O <sub>3</sub>   | 7.88%           | 44        |
| ITO/PEDOT:PSS/PM6:Y6/Bis-FIMG                                                         | Ag/TeO <sub>2</sub> /Ag                                             | 14.60%          | 45        |
| ITO/PEDOT:PSS/PM6:N3:PC <sub>71</sub> BM/PDINO                                        | Al:Ag/dielectric stack/Al:Ag/dielectric stacks/carbon fluoride (CF) | 15.07%          | 46        |
| ITO/ZnO/PTB7-Th:ITIC/MoO <sub>3</sub>                                                 | Ag/TiO <sub>2</sub> -AcAc/Ag                                        | 5.96%           | 47        |
| ITO/ZnO/PTB7-Th:PC <sub>71</sub> BM/MoO <sub>3</sub>                                  | Ag/ITO/Ag                                                           | 8.20%           | 48        |
| ITO/ZnO/PTB7-Th:PC <sub>71</sub> BM/MoO <sub>3</sub>                                  | Au/Ag/WO <sub>3</sub> /Ag                                           | 9.02%           | 49        |
| ITO/ZnO/PM7:PTTtID-Cl:IT-4F/MoO <sub>3</sub>                                          | Ag/ITO/Ag                                                           | 9.10%           | 50        |
| ITO/ZnO/PEIE/PM6:Y6/MoO <sub>3</sub>                                                  | Ag/HAT-CN/Ag                                                        | 13.28%          | 51        |
| ITO/PEDOT:PSS/MAPbI <sub>3-x</sub> Cl <sub>x</sub> /PC <sub>61</sub> BM               | Ag/ITO/Ag                                                           | 7.60%           | 52        |
| ITO/NiO/MAPbI <sub>3</sub> /PCBM/BCP                                                  | Ag/SiO <sub>2</sub> /ZnS/Ag/ZnS                                     | 11.18%          | 53        |
| ITO/ZnO/PM6:Y6/MoO <sub>3</sub>                                                       | Al:Ag/HAT-CN/Al:Ag                                                  | 13.62%          | This work |
